# Supplementary material for: Luminescent lanthanide-2-phenylpyrimidine-carboxylate frameworks: structure and luminescence tuning
Source: Royal Society of Chemistry journal article supplement (doi:10.1039/c4ce00360h), 2014-01-01
Supplement: c4ce00360h1.pdf [file c4ce00360h1.pdf]

## **Luminescent Lanthanide-2-phenylpyrimidine-carboxylate Framework: Structure and Luminescence Tuning**

Li Jia,<sup>a</sup> Yan-Chun Hui,<sup>a</sup> Zongsheng Li,<sup>b</sup> Hao-Ling Sun,<sup>a\*</sup> and Zhenqiang Wang<sup>c\*</sup>

<sup>a</sup> *Department of Chemistry and Beijing Key Laboratory of Energy Conversion and Storage Materials, Beijing Normal University, Beijing 100875, P. R. China E-mail: [haolingsun@bnu.edu.cn](mailto:haolingsun@bnu.edu.cn);*

<sup>b</sup> *College of Safety and Environment Engineering, Capital University of Economics and Business, Beijing 100070, People's Republic of China*

<sup>c</sup> *Department of Chemistry, The University of South Dakota, 414 E. Clark Street, Vermillion, SD 57069. E-mail: [Zhenqiang.Wang@usd.edu](mailto:Zhenqiang.Wang@usd.edu)*

**Table S1** Selected bond lengths (Å) and bond angles (deg) for compounds **1-2**.

| <b>1</b>   |          |           |          |           |          |        |          |
|------------|----------|-----------|----------|-----------|----------|--------|----------|
| Eu-O1      | 2.346(5) | Eu-O2a    | 2.337(5) | Eu-O3     | 2.380(5) | Eu-O4a | 2.329(5) |
| Eu-O5      | 2.515(5) | Eu-O6     | 2.412(5) | Eu-N7     | 2.570(5) | Eu-N8  | 2.596(6) |
| O4a-Eu-O2a | 80.1(2)  | O4a-Eu-O1 | 77.5(2)  | O2a-Eu-O1 | 124.7(2) |        |          |
| O4a-Eu-O3  | 125.1(2) | O2a-Eu-O3 | 74.8(2)  | O1-Eu-O3  | 78.2(2)  |        |          |
| O4a-Eu-O6  | 131.8(2) | O2a-Eu-O6 | 82.1(2)  | O1-Eu-O6  | 146.4(2) |        |          |
| O3-Eu-O6   | 91.9(2)  | O4a-Eu-O5 | 79.5(2)  | O2a-Eu-O5 | 74.0(2)  |        |          |
| O1-Eu-O5   | 146.5(2) | O3-Eu-O5  | 135.2(2) | O6-Eu-O5  | 52.6(2)  |        |          |
| O4a-Eu-N7  | 82.3(2)  | O2a-Eu-N7 | 143.9(2) | O1-Eu-N7  | 81.1(2)  |        |          |
| O3-Eu-N7   | 140.0(2) | O6-Eu-N7  | 86.7(2)  | O5-Eu-N7  | 72.0(2)  |        |          |
| O4a-Eu-N8  | 137.1(2) | O2a-Eu-N8 | 142.7(2) | O1-Eu-N8  | 72.7(2)  |        |          |
| O3-Eu-N8   | 77.9(2)  | O6-Eu-N8  | 73.9(2)  | O5-Eu-N8  | 110.5(2) |        |          |
| N7-Eu-N8   | 63.3(2)  |           |          |           |          |        |          |

  

| <b>2</b>   |          |           |          |           |          |        |          |
|------------|----------|-----------|----------|-----------|----------|--------|----------|
| Tb-O1      | 2.329(3) | Tb-O2a    | 2.327(3) | Tb-O3     | 2.353(3) | Tb-O4a | 2.296(3) |
| Tb-O5      | 2.505(3) | Tb-O6     | 2.399(3) | Tb-N7     | 2.554(3) | Tb-N8  | 2.586(3) |
| O4a-Tb-O2a | 80.7(1)  | O4a-Tb-O1 | 77.1(1)  | O2a-Tb-O1 | 124.9(1) |        |          |
| O4a-Tb-O3  | 125.4(1) | O2a-Tb-O3 | 74.4(1)  | O1-Tb-O3  | 78.8(1)  |        |          |
| O4a-Tb-O6  | 132.3(1) | O2a-Tb-O6 | 81.5(1)  | O1-Tb-O6  | 146.4(1) |        |          |
| O3-Tb-O6   | 91.1(1)  | O4a-Tb-O5 | 79.5(1)  | O2a-Tb-O5 | 73.6(1)  |        |          |
| O1-Tb-O5   | 146.6(1) | O3-Tb-O5  | 134.6(1) | O6-Tb-O5  | 53.0(1)  |        |          |
| O4a-Tb-N7  | 81.6(1)  | O2a-Tb-N7 | 143.7(1) | O1-Tb-N7  | 81.0(1)  |        |          |
| O3-Tb-N7   | 140.6(1) | O6-Tb-N7  | 87.5(1)  | O5-Tb-N7  | 72.2(1)  |        |          |
| O4a-Tb-N8  | 136.7(1) | O2a-Tb-N8 | 142.4(1) | O1-Tb-N8  | 72.6(1)  |        |          |
| O3-Tb-N8   | 77.9(1)  | O6-Tb-N8  | 74.0(1)  | O5-Tb-N8  | 111.0(1) |        |          |
| N7-Tb-N8   | 63.9(1)  |           |          |           |          |        |          |

**Table S2** Selected Bond Lengths (Å) and Bond Angles (deg) for Compounds **3-4**

| <b>3</b>  |           |           |           |           |           |
|-----------|-----------|-----------|-----------|-----------|-----------|
| Eu-O1     | 2.300(3)  | Eu-O3     | 2.389(3)  | Eu-O5     | 2.399(2)  |
| Eu-O7     | 2.443(3)  | Eu-O6     | 2.420(2)  | Eu-O4a    | 2.376(3)  |
| Eu-N1     | 2.552(3)  | Eu-N2     | 2.590(3)  |           |           |
| O1-Eu-O4a | 149.9(1)  | O1-Eu-O5  | 82.4(1)   | O4a-Eu-O5 | 78.31(9)  |
| O1-Eu-O3  | 85.5(1)   | O4a-Eu-O3 | 110.77(9) | O5-Eu-O3  | 74.28(9)  |
| O1-Eu-O6  | 74.98(9)  | O4a-Eu-O6 | 76.39(9)  | O5-Eu-O6  | 67.58(8)  |
| O3-Eu-O6  | 138.89(9) | O1-Eu-O7  | 138.0(1)  | O4a-Eu-O7 | 71.7(1)   |
| O5-Eu-O7  | 128.21(9) | O3-Eu-O7  | 78.2(1)   | O6-Eu-O7  | 138.6(1)  |
| O1-Eu-N1  | 94.3(1)   | O4a-Eu-N1 | 87.6(1)   | O5-Eu-N1  | 142.94(9) |
| O3-Eu-N1  | 142.5(1)  | O6-Eu-N1  | 75.86(9)  | O7-Eu-N1  | 77.2(1)   |
| O1-Eu-N2  | 71.1(1)   | O4a-Eu-N2 | 134.8(1)  |           |           |
| <b>4</b>  |           |           |           |           |           |
| Tb-O1     | 2.272(3)  | Tb-O3     | 2.353(3)  | Tb-O5     | 2.372(3)  |
| Tb-O7     | 2.412(3)  | Tb-O6     | 2.390(3)  | Tb-O4a    | 2.344(3)  |
| Tb-N1     | 2.528(3)  | Tb-N2     | 2.569(3)  |           |           |
| O1-Tb-O4a | 149.8(1)  | O1-Tb-O5  | 82.5(1)   | O4a-Tb-O5 | 78.4(1)   |
| O1-Tb-O3  | 85.8(1)   | O4a-Tb-O3 | 110.7(1)  | O5-Tb-O3  | 74.11(9)  |
| O1-Tb-O6  | 75.1(1)   | O4a-Tb-O6 | 76.2(1)   | O5-Tb-O6  | 67.92(9)  |
| O3-Tb-O6  | 139.14(9) | O1-Tb-O7  | 137.9(1)  | O4a-Tb-O7 | 71.8(1)   |
| O5-Tb-O7  | 127.9(1)  | O3-Tb-O7  | 77.8(1)   | O6-Tb-O7  | 138.7(1)  |
| O1-Tb-N1  | 94.6(1)   | O4a-Tb-N1 | 86.9(1)   | O5-Tb-N1  | 142.8(1)  |
| O3-Tb-N1  | 142.9(1)  | O6-Tb-N1  | 75.5(1)   | O7-Tb-N1  | 77.3(1)   |
| O1-Tb-N2  | 71.2(1)   | O4a-Tb-N2 | 134.8(1)  |           |           |

**Table S3** Selected Bond Lengths (Å) and Bond Angles (deg) for Compounds **5-6**

| <b>5</b>   |           |            |           |            |           |
|------------|-----------|------------|-----------|------------|-----------|
| Eu-O1      | 2.404(3)  | Eu-O2c     | 2.406(3)  | Eu-O3a     | 2.505(3)  |
| Eu-O4a     | 2.775(3)  | Eu-O4d     | 2.409(3)  | Eu-O5      | 2.451(3)  |
| Eu-O6b     | 2.397(3)  | Eu-N3      | 2.625(3)  | Eu-N4      | 2.571(3)  |
| O1-Eu-O6b  | 82.13(9)  | O1-Eu-O2c  | 133.12(9) | O6b-Eu-O2c | 141.48(9) |
| O1-Eu-O5   | 137.28(9) | O6b-Eu-O5  | 67.13(9)  | O2c-Eu-O5  | 74.81(9)  |
| O1-Eu-O4d  | 74.8(1)   | O6b-Eu-O4d | 143.6(1)  | O2c-Eu-O4d | 72.0(1)   |
| O5-Eu-O4d  | 145.63(9) | O1-Eu-O3a  | 74.1(1)   | O6b-Eu-O3a | 77.3(1)   |
| O2c-Eu-O3a | 96.1(1)   | O5-Eu-O3a  | 70.8(1)   | O4d-Eu-O3a | 121.1(1)  |
| O1-Eu-N4   | 137.9(1)  | O6b-Eu-N4  | 89.8(1)   | O2c-Eu-N4  | 73.4(1)   |
| O5-Eu-N4   | 73.2(1)   | O4d-Eu-N4  | 88.9(1)   | O3a-Eu-N4  | 144.0(1)  |
| O1-Eu-N3   | 75.0(1)   | O6b-Eu-N3  | 72.3(1)   | O2c-Eu-N3  | 124.9(1)  |
| O5-Eu-N3   | 119.2(1)  | O4d-Eu-N3  | 74.8(1)   |            |           |
| <b>6</b>   |           |            |           |            |           |
| Tb-O1      | 2.437(2)  | Tb-O2      | 2.439(2)  | Tb-O3a     | 2.306(2)  |
| Tb-O4d     | 2.351(2)  | Tb-O5      | 2.304(2)  | Tb-O6c     | 2.335(2)  |
| Tb-N3      | 2.563(3)  | Tb-N4      | 2.567(3)  |            |           |
| O5-Tb-O3a  | 77.29(8)  | O5-Tb-O6c  | 124.72(8) | O3a-Tb-O6c | 79.88(7)  |
| O6c-Tb-O4d | 75.13(7)  | O5-Tb-O4d  | 78.48(8)  | O3a-Tb-O4d | 125.29(7) |
| O5-Tb-O1   | 78.44(8)  | O3a-Tb-O1  | 81.58(7)  | O6c-Tb-O1  | 145.47(7) |
| O4d-Tb-O1  | 138.76(7) | O5-Tb-O2   | 79.63(8)  | O3a-Tb-O2  | 132.77(7) |
| O6c-Tb-O2  | 145.74(7) | O4d-Tb-O2  | 88.84(7)  | O1-Tb-O2   | 53.58(7)  |
| O5-Tb-N3   | 143.53(9) | O3a-Tb-N3  | 139.18(9) | O6c-Tb-N3  | 73.77(8)  |
| O4d-Tb-N3  | 77.12(8)  | O1-Tb-N3   | 103.28(8) | O2-Tb-N3   | 73.21(8)  |
| O5-Tb-N4   | 146.68(9) | O3a-Tb-N4  | 78.71(9)  | O6c-Tb-N4  | 72.51(8)  |
| O4d-Tb-N4  | 134.71(9) | O1-Tb-N4   | 75.45(8)  | O2-Tb-N4   | 100.62(8) |
| N3-Tb-N4   | 64.01(9)  |            |           |            |           |

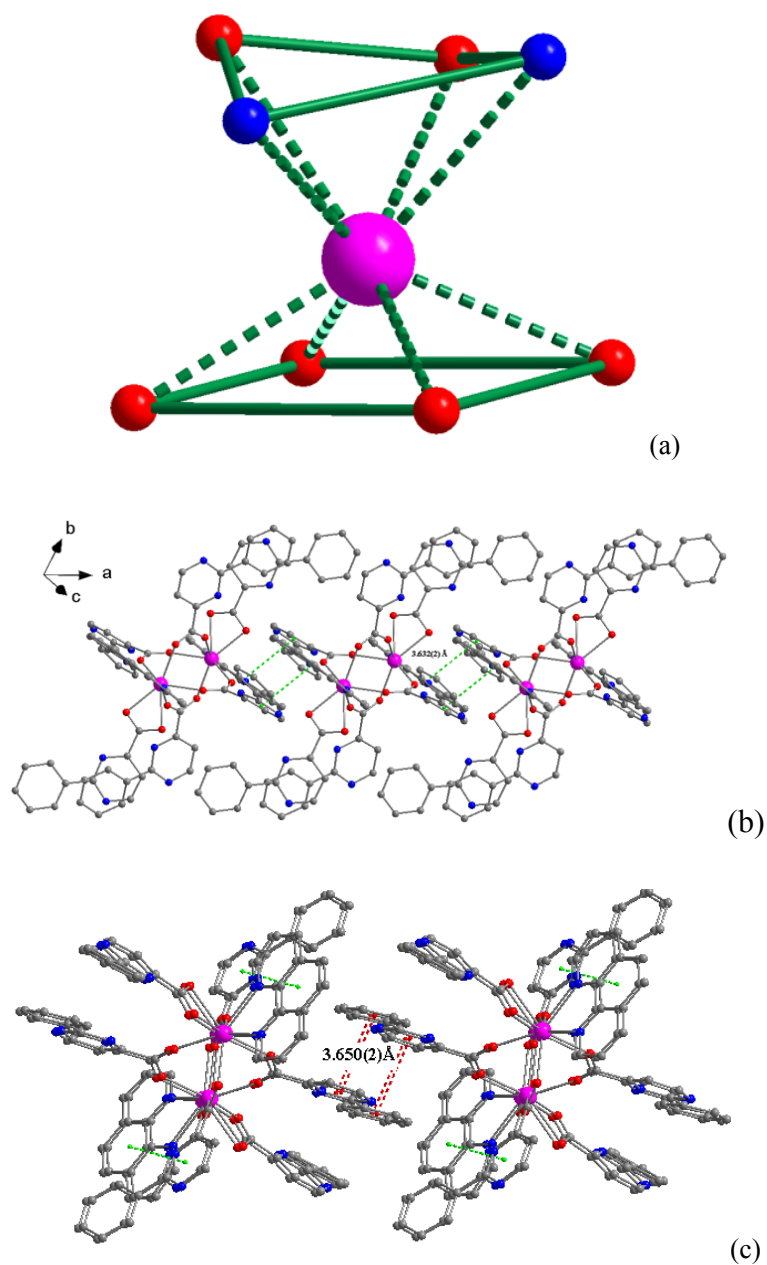

**Fig. S1** The coordination polyhedron of Ln<sup>3+</sup> (a), the 1D chain structure (b) and the 3D structure (c) constructed by  $\pi$ - $\pi$  stacking between the phen and ppmc<sup>-</sup> ligands in **1** and **2**. (phen and the hydrogen atoms of ring were omitted for clarity)

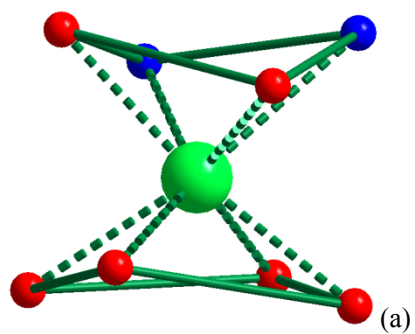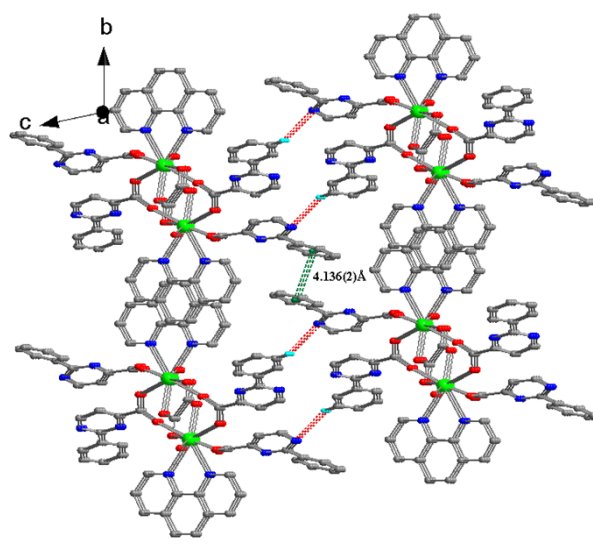

**Fig. S2** The coordination polyhedron of Ln<sup>3+</sup> (a) the 3D structure constructed by  $\pi$ - $\pi$  stacking and the C-H...N weak hydrogen bonds between the phen and ppmc<sup>-</sup> ligands (b) in **3** and **4**.

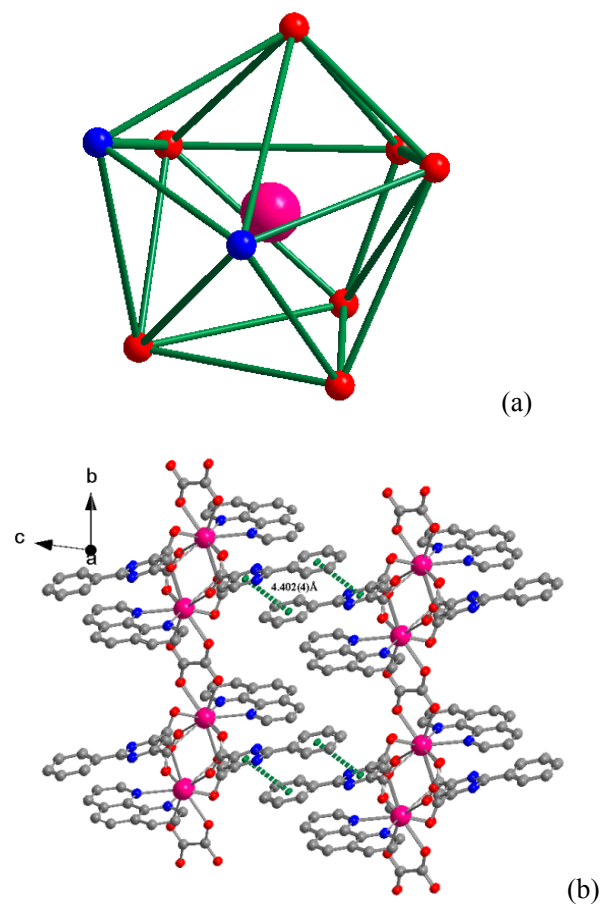

**Fig. S3** The coordination polyhedron of  $\text{Eu}^{3+}$  (a) and the 3D supramolecular structure connected by  $\pi$ - $\pi$  stacking (b) in **5**.

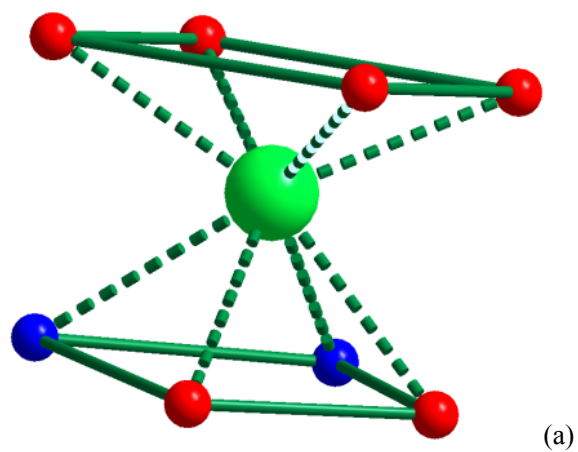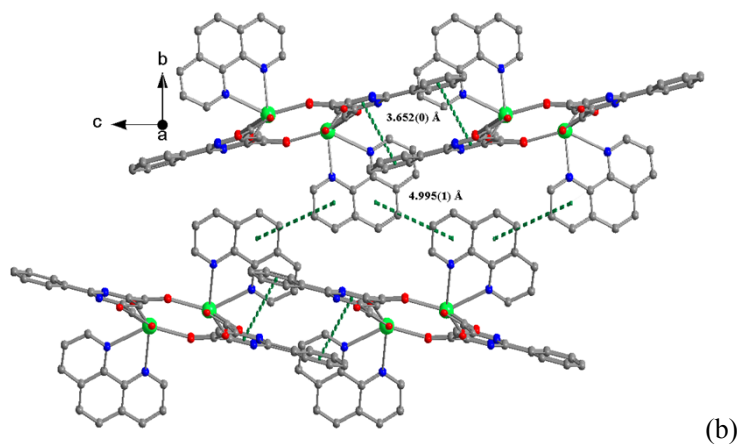

**Fig. S4** The coordination polyhedron of Tb<sup>3+</sup> (a) and the 3D supramolecular structure connected by  $\pi$ - $\pi$  stacking (b) in **6**.



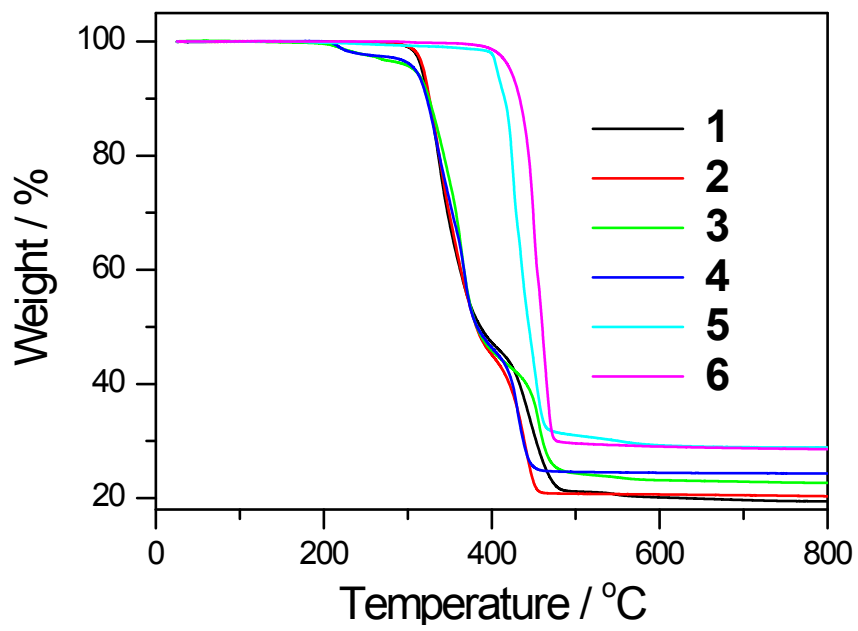

**Fig. S5** TGA curve of complexes 1-6.

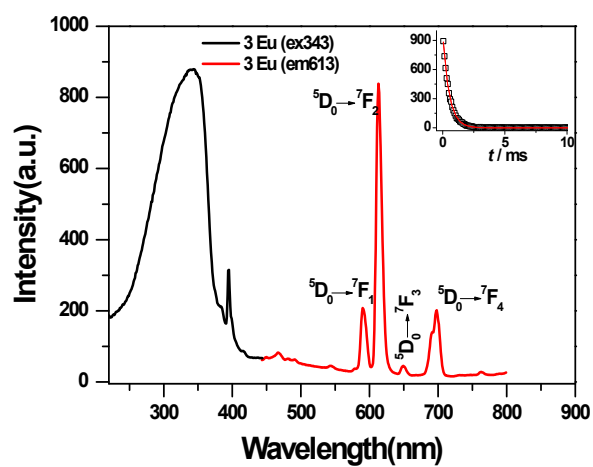

(a)

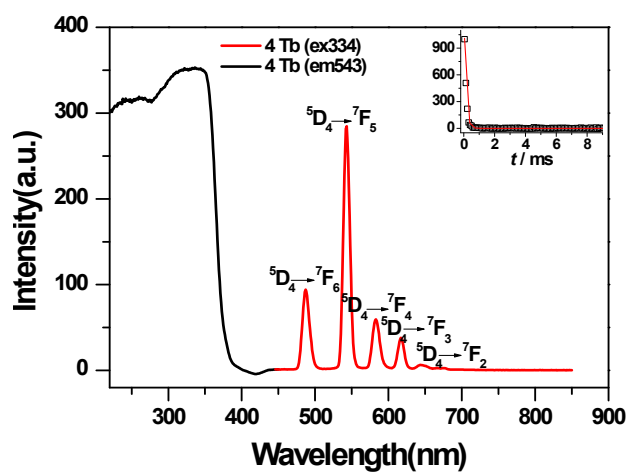

(b)

**Fig. S6** Solid-state excitation/emission spectra and the emission decay pattern (inset) of **3** (a) and **4** (b).

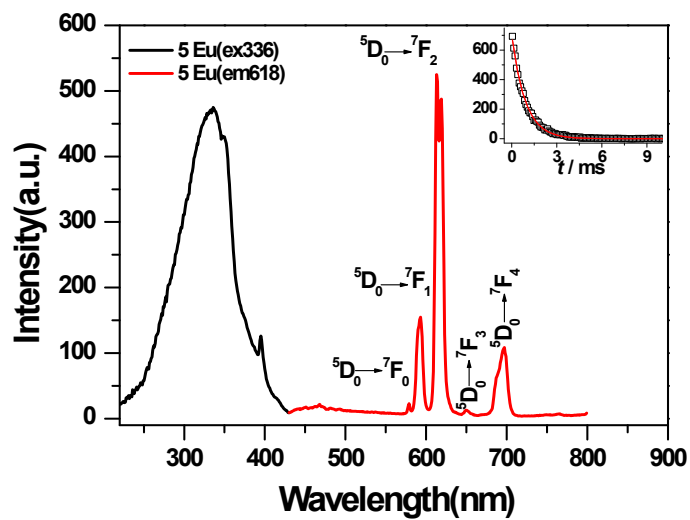

(a)

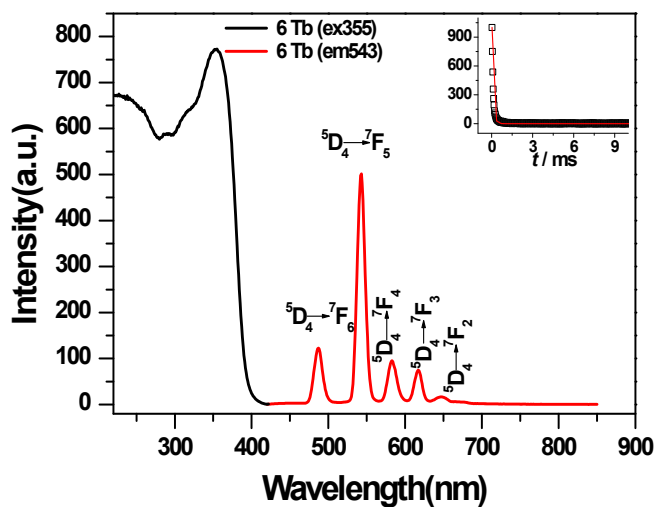

(b)

**Fig. S7** Solid-state excitation/emission spectra and the emission decay pattern (inset) of **5** (a) and **6** (b).

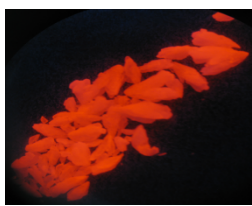

1

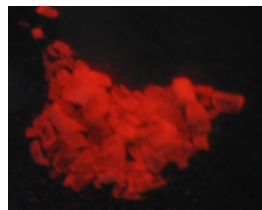

3

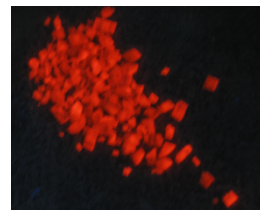

5

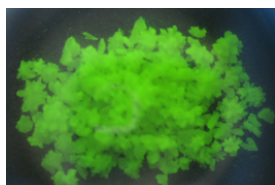

2

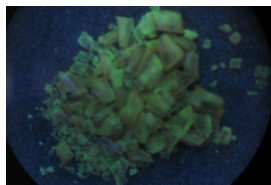

4

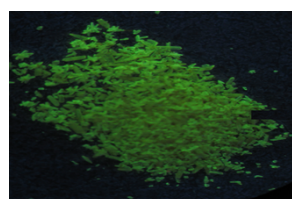

6

**Fig. S8** Photos of compound **1-6** under UV light.
